# Supplementary material for: Expression of poly(ADP-ribose) polymerase-1 gene and optical coherence tomography angiographic parameters among patients with multiple sclerosis
Source: HighWire-hosted journal article supplement (doi:10.1136/bmjophth-2022-001157), 2022-12-01
Supplement: bmjophth-2022-001157supp001_data_supplement.pdf [file bmjophth-2022-001157supp001_data_supplement.pdf]

**Supplementary table (1): Post hoc analysis (TUKEY) test:**

| Dependent Variable |               |        | Mean Difference      | Std. Error | Sig. |
|--------------------|---------------|--------|----------------------|------------|------|
| BCVA               | control group | MS ON+ | .59125 <sup>*</sup>  | .03003     | .000 |
|                    |               | MS ON- | .29500 <sup>*</sup>  | .03003     | .000 |
| CMT                | control group | MS ON+ | 14.875 <sup>*</sup>  | 4.288      | .002 |
|                    |               | MS ON- | 5.975                | 4.288      | .348 |
| TMV                | control group | MS ON+ | .44425 <sup>*</sup>  | .06232     | .000 |
|                    |               | MS ON- | .28425 <sup>*</sup>  | .06232     | .000 |
| SS Peri -FVD       | control group | MS ON+ | 2.250 <sup>*</sup>   | .721       | .006 |
|                    |               | MS ON- | 2.300 <sup>*</sup>   | .721       | .005 |
| SN Para-FVD        | control group | MS ON+ | -1.500-              | .926       | .241 |
|                    |               | MS ON- | -2.800- <sup>*</sup> | .926       | .009 |
| FFVD               | control group | MS ON+ | 17.450 <sup>*</sup>  | 3.857      | .000 |
|                    |               | MS ON- | 5.800                | 3.857      | .293 |
| FS Para-FVD        | control group | MS ON+ | 18.000 <sup>*</sup>  | 4.747      | .001 |
|                    |               | MS ON- | 12.100 <sup>*</sup>  | 4.747      | .032 |
| FS Peri-FVD        | MS ON-        | MS ON+ | 17.350 <sup>*</sup>  | 3.033      | .000 |
|                    |               | MS ON- | 6.700                | 3.033      | .074 |
| FI Para-FVD        | control group | MS ON+ | 23.575 <sup>*</sup>  | 3.167      | .000 |
|                    |               | MS ON- | 21.775 <sup>*</sup>  | 3.167      | .000 |
| FI Peri- FVD       | control group | MS ON+ | 19.084 <sup>*</sup>  | 3.223      | .000 |
|                    |               | MS ON- | 9.934 <sup>*</sup>   | 3.223      | .007 |
| FN Para-FVD        | control group | MS ON+ | 10.125               | 5.082      | .119 |
|                    |               | MS ON- | 14.675 <sup>*</sup>  | 5.082      | .013 |
| FN Peri-FVD        | control group | MS ON+ | 16.171 <sup>*</sup>  | 4.297      | .001 |
|                    |               | MS ON- | 3.171                | 4.297      | .741 |
| FT Para-FVD        | control group | MS ON+ | 19.375 <sup>*</sup>  | 3.388      | .000 |
|                    |               | MS ON- | 20.075 <sup>*</sup>  | 3.388      | .000 |
| FT Peri-FVD        | control group | MS ON+ | 21.650 <sup>*</sup>  | 4.033      | .000 |
|                    |               | MS ON- | 14.183 <sup>*</sup>  | 4.356      | .004 |
| SRNFL              | control group | MS ON+ | 7.650 <sup>*</sup>   | 3.189      | .047 |
|                    |               | MS ON- | 8.050 <sup>*</sup>   | 3.189      | .034 |
| IRNFL              | control group | MS ON+ | 15.925 <sup>*</sup>  | 3.496      | .000 |
|                    |               | MS ON- | 15.225 <sup>*</sup>  | 3.496      | .000 |
| NRNFL              | control group | MS ON+ | 9.100 <sup>*</sup>   | 2.417      | .001 |

|             |               |        |                      |        |      |
|-------------|---------------|--------|----------------------|--------|------|
|             |               | MS ON- | 7.000*               | 2.417  | .012 |
| TRNFL       | control group | MS ON+ | 11.300*              | 2.150  | .000 |
|             |               | MS ON- | 17.650*              | 2.150  | .000 |
| Average GCC | control group | MS ON+ | 11.125*              | 1.939  | .000 |
|             |               | MS ON- | 11.575*              | 1.939  | .000 |
| SGCC        | control group | MS ON+ | 25.925*              | 8.833  | .011 |
|             |               | MS ON- | 24.675*              | 8.833  | .017 |
| IGCC        | control group | MS ON+ | 10.975*              | 1.995  | .000 |
|             |               | MS ON- | 13.375*              | 1.995  | .000 |
| SDVD        | control group | MS ON+ | .575                 | .941   | .814 |
|             |               | MS ON- | 3.425*               | .941   | .001 |
| IDVD        | control group | MS ON+ | 1.075                | 1.305  | .689 |
|             |               | MS ON- | 3.175*               | 1.305  | .043 |
| NDVD        | control group | MS ON+ | .325                 | 1.213  | .961 |
|             |               | MS ON- | 3.925*               | 1.213  | .004 |
| TDVD        | control group | MS ON+ | 2.725*               | 1.120  | .043 |
|             |               | MS ON- | 1.125                | 1.120  | .575 |
| PARP 1      | control group | MS ON+ | -.23100 <sup>-</sup> | .02980 | .000 |
|             |               | MS ON- | -.14300 <sup>-</sup> | .02980 | .000 |

CMT (central macular thickness), TMV (total macular volume), SS Peri-FVD (superficial superior peri-foveal vessel density), SN Para-FVD (superficial nasal para-foveal vessel density), FFVD (full foveal vessel density), FS Para-FVD (full superior para-foveal vessel density), FS Peri-FVD (full superior peri-foveal vessel density), FI Para-FVD (full inferior para-foveal vessel density), FI-Peri FVD (full inferior peri-foveal vessel density), FN Para-FVD (full nasal para foveal vessel density), FN Peri-FVD (full nasal peri-foveal vessel density), FT Para-FVD (full temporal para-foveal vessel density), FT Peri-FVD (full temporal peri-foveal vessel density), SRNFL (superior peri-papillary retinal nerve fiber layer thickness), IRNFL (inferior peri-papillary retinal nerve fiber layer thickness), NRNFL (nasal peri-papillary retinal nerve fiber layer thickness), TRNFL (temporal peri-papillary retinal nerve fiber layer thickness), Average GCC (average ganglion cell complex thickness), SGCC (superior ganglion cell complex thickness), IGCC (inferior ganglion cell complex thickness), SDVD (superior disc vessel density), IDVD (inferior disc vessel density), NDVD (nasal disc vessel density), TDVD (temporal disc vessel density), PARP1 (Poly(ADP-ribose) Polymerase-1).

**Supplementary 2: Bivariate correlation between PARP 1 levels and other parameters in both groups**

| PARP-1 with the following parameter | Ms with optic neuritis |       | Ms without optic neuritis |      |
|-------------------------------------|------------------------|-------|---------------------------|------|
|                                     | (r)                    | P     | (r)                       | P    |
| CM thickness                        | -.465                  | .002  | -.065                     | .690 |
| TMV                                 | -.420                  | .007  | .143                      | .380 |
| Average GCC                         | .443                   | .004  | .269                      | .094 |
| TDVD                                | -.428                  | .006  | -.081-                    | 0.6  |
| BCVA                                | -0.414                 | 0.008 | -0.17                     | 0.27 |

CMT (central macular thickness), TMV (total macular volume), Average GCC (ganglion cell complex), TDVD (temporal disc vessel density), BCVA (best corrected visual acuity)

**Supplementary 3: Comparison between the studied group regarding PARP 1 levels**

|       | MS (ON+)<br>N=40 |     | MS (ON-)<br>N=40 |     | Control<br>N=40 |     | P value |
|-------|------------------|-----|------------------|-----|-----------------|-----|---------|
|       | Mean             | SD  | Mean             | SD  | Mean            | SD  |         |
| PARP1 | .53              | .18 | .44              | .14 | .30             | .05 | <0.0009 |

\*p-value was calculated by one-way ANOVA test
